# Serotonin Antagonism Improves Platelet Inhibition in Clopidogrel Low-Responders after Coronary Stent Placement: An *In Vitro* Pilot Study

Daniel Duerschmied\*, Ingo Ahrens, Maximilian Mauler, Christoph Brandt, Stefanie Weidner, Christoph Bode, Martin Moser

Department of Cardiology and Angiology, University Medical Center Freiburg, Freiburg, Germany

## Abstract

Increased residual platelet reactivity remains a burden for coronary artery disease (CAD) patients who received a coronary stent and do not respond sufficiently to treatment with acetylsalicylic acid and clopidogrel. We hypothesized that serotonin antagonism reduces high on-treatment platelet reactivity. Whole blood impedance aggregometry was performed with arachidonic acid (AA, 0.5 mM) and adenosine diphosphate (ADP, 6.5  $\mu$ M) in addition to different concentrations of serotonin (1–100  $\mu$ M) in whole blood from 42 CAD patients after coronary stent placement and 10 healthy subjects. Serotonin increased aggregation dose-dependently in CAD patients who responded to clopidogrel treatment: After activation with ADP, aggregation increased from  $33.7 \pm 1.3\%$  to  $40.9 \pm 2.0\%$  in the presence of 50  $\mu$ M serotonin ( $p < 0.05$ ) and to  $48.2 \pm 2.0\%$  with 100  $\mu$ M serotonin ( $p < 0.001$ ). The platelet serotonin receptor antagonist ketanserin decreased ADP-induced aggregation significantly in clopidogrel low-responders (from  $59.9 \pm 3.1\%$  to  $37.4 \pm 3.5$ ,  $p < 0.01$ ), but not in clopidogrel responders. These results were confirmed with light transmission aggregometry in platelet-rich plasma in a subset of patients. Serotonin hence increased residual platelet reactivity in patients who respond to clopidogrel after coronary stent placement. In clopidogrel low-responders, serotonin receptor antagonism improved platelet inhibition, almost reaching responder levels. This may justify further investigation of triple antiplatelet therapy with anti-serotonergic agents.

**Citation:** Duerschmied D, Ahrens I, Mauler M, Brandt C, Weidner S, et al. (2012) Serotonin Antagonism Improves Platelet Inhibition in Clopidogrel Low-Responders after Coronary Stent Placement: An *In Vitro* Pilot Study. PLoS ONE 7(2): e32656. doi:10.1371/journal.pone.0032656

**Editor:** Christian Schulz, Heart Center Munich, Germany

**Received:** August 23, 2011; **Accepted:** January 31, 2012; **Published:** February 27, 2012

**Copyright:** © 2012 Duerschmied et al. This is an open-access article distributed under the terms of the Creative Commons Attribution License, which permits unrestricted use, distribution, and reproduction in any medium, provided the original author and source are credited.

**Funding:** This pilot study was investigator initiated and financed by the University Medical Center of Freiburg. The funder had no role in study design, data collection and analysis, decision to publish, or preparation of the manuscript.

**Competing Interests:** The authors have declared that no competing interests exist.

\* E-mail: daniel.duerschmied@uniklinik-freiburg.de

## Introduction

In myocardial infarction - the critical event in coronary artery disease (CAD) - plaque rupture initiates platelet activation resulting in atherothrombotic coronary artery occlusion [1]. Percutaneous coronary intervention with stent placement is the standard of care treatment for patients with critical CAD [2,3]. Implantation of a coronary stent further stimulates the adhesion and activation of platelets, which makes a highly efficient inhibition of platelet activation mandatory until endothelialization of the stent is complete [4]. Current guidelines recommend dual antiplatelet therapy for these patients, consisting of the lifelong administration of acetylsalicylic acid (ASA, aspirin - cyclooxygenase inhibition) in combination with an adenosine diphosphate (ADP) P2Y<sub>12</sub> receptor antagonist for the first 12 months [2,3]. In acute coronary syndrome the newer P2Y<sub>12</sub> receptor antagonists ticagrelor and prasugrel are preferred, but clopidogrel remains the standard substance when ticagrelor or prasugrel are contraindicated or unavailable and in patients undergoing elective stenting.

An important clinical problem is hypo-responsiveness to clopidogrel [5,6]. Clopidogrel is a prodrug and must be metabolized in intestines and liver to produce an active metabolite that binds the P2Y<sub>12</sub> receptor [7]. In March 2010, the Food and Drug Administration added a boxed warning to the label of

clopidogrel to highlight its reduced effectiveness in poor metabolizers. Approximately 30% of patients are considered poor responders as evaluated by ADP-induced platelet aggregation [8,9,10]. Apart from absorption and receptor reactivity, genetic and drug-induced variations in cytochrome P450 activity are responsible for the inter-individual variability in clopidogrel responsiveness [11]. High on-treatment platelet reactivity to ADP is associated with adverse clinical event occurrence, but the wide variety of definitions of residual platelet reactivity has only recently been addressed by a consensus statement [12]. To date, it is not clear which measure of platelet reactivity and which cut-off points should be used.

Light transmission aggregometry (LTA) is largely considered as the gold standard to evaluate platelet function with respect to pharmacological platelet inhibition, but is poorly standardized [12,13]. For LTA, platelet-rich plasma (PRP) is prepared by centrifugation and stimulated by adding a platelet agonist. The increase of transmitted light is proportional to the formation of aggregates under stirring conditions. The level of platelet aggregation in LTA predicted the early outcome after elective coronary stent placement in 802 patients treated with clopidogrel [14]. Whole blood impedance aggregometry, like e.g. with the point-of-care assay Multiplate® measures the increase in impedance due to attachment of platelets to electrodes [15]. A study with

416 patients undergoing coronary stent placement suggested that multiple electrode aggregometry (MEA) with Multiplate is equivalent to other assays in identifying patients at risk for stent thrombosis [16].

Serotonin is a weak platelet activator promoting hemostasis by enhancing platelet alpha granule release and by enhancing plasmatic coagulation [17,18,19,20]. Together with ADP, serotonin is stored in platelet dense granules (at millimolar concentrations) and released upon platelet activation, locally reaching micromolar levels at sites of coronary atherothrombosis [21,22,23]. Released serotonin is also a potent vasoconstrictor of coronary arteries with damaged endothelium [24]. Serotonin antagonism as well as platelet serotonin depletion by treatment with selective serotonin reuptake inhibitors have both been associated with a reduction in arterial thrombogenicity [17,25,26]. Therefore, serotonin antagonism in addition to established therapies might be a promising approach to improve the treatment of CAD patients. This concept was proposed as triple antiplatelet therapy, but to our knowledge has not yet been evaluated systematically. In consequence, we hypothesized that serotonin antagonism may reduce high on-treatment platelet reactivity in ASA- and clopidogrel-treated patients. We used MEA in whole blood from CAD patients who had received a coronary stent within the past 1–3 days to test this hypothesis and confirmed the results with LTA. We found first that addition of exogenous serotonin increased platelet aggregation in blood from patients who responded well to ASA and clopidogrel treatment. Secondly, *in vitro* serotonin receptor antagonism with ketanserin reduced high on-treatment platelet reactivity in clopidogrel low-responders.

## Materials and Methods

### Patient enrollment and ethics statement

This pilot study examined the *ex vivo* effects of serotonin and a serotonin receptor antagonist on platelets from patients who were treated with ASA and clopidogrel after coronary stent placement. The protocol complied with the Declaration of Helsinki and was approved by the Ethics Committee of the University of Freiburg, Germany. The study was planned prospectively. Participants were considered eligible for enrollment if they were >18 years of age. CAD patients gave verbal informed consent for additional *ex vivo* measurements with routinely acquired platelet aggregometry blood samples (which was documented in a log sheet) and written consent was acquired retrospectively to comply with ethical guidelines. Healthy control subjects and CAD patients donating an additional blood sample for LTA gave written informed consent before sample acquisition. CAD patients receiving ASA and clopidogrel were recruited consecutively from the local Department of Cardiology from November 4<sup>th</sup>, 2009 through December 2<sup>nd</sup>, 2010 and CAD patients receiving ASA only were recruited from November 20<sup>th</sup>, 2011 through December 29<sup>th</sup>, 2011. Depression and current medication with serotonin reuptake inhibitors were exclusion criteria. Thrombocytopenia  $\leq 100,000/\text{mm}^3$  was also an exclusion criterion. CAD patients had received a loading dose of 600 mg clopidogrel and at least 300 mg ASA prior to coronary angiography according to standard operating procedure at the local institution. Patients then received 75 mg clopidogrel and 100 mg ASA once daily and compliance was documented. A blood sample was taken on day 1–3 after stent placement, while the patients were still hospitalized. Acute coronary syndrome patients who had received treatment with a glycoprotein IIb/IIIa inhibitor were excluded. CAD patients treated with ASA only had not undergone coronary angiography and were not exposed to clopidogrel prior to blood sampling.

Control subjects were healthy and without current medication. Control subjects were not included if they had taken ASA or any other non-steroidal anti-inflammatory drug within the prior 7 days.

A power calculation for an alpha or 0.05 yielded a necessary sample size of at least 10 per group to detect a difference in mean aggregation of 9.5% with an assumed standard deviation of 7% with a power of 80% (G\*Power 3.0.10, Heinrich Heine University, Duesseldorf, Germany). Between 15 and 40% of patients were considered poor responders to clopidogrel treatment in several studies applying similar criteria as in our study (see below) [8,9,10]. We therefore envisioned including 45 CAD patients in order to have a group of approximately 10 clopidogrel low-responders. Two CAD patients were excluded from the study because the platelet aggregation response to TRAP was below the pre-defined threshold (see below) and 1 CAD patient withdrew informed consent.

### Materials

Serotonin hydrochloride, ketanserin, sarpogrelate hydrochloride, and Prostaglandin (Pg) E<sub>1</sub> were obtained from Sigma-Aldrich (Munich, Germany). Thrombin receptor activating peptide-6 (TRAP), arachidonic acid (AA), and ADP were obtained from Verum Diagnostica (Munich, Germany). Blood collection tubes were purchased from Sarstedt (Nuernbrecht, Germany).

### Sample acquisition

A 5.2 ml blood sample was taken from all study participants for multiple electrode aggregometry (MEA) and anticoagulated with 0.045 mg/ml hirudin. For LTA, 30 ml of blood were taken from all control subjects and a third of the enrolled CAD patients (randomly chosen) and anticoagulated with 0.011 mol/l trisodium citrate. MEA and LTA were performed within 2 h after sample acquisition.

### Whole blood impedance aggregometry

Hirudinized blood was diluted with an equal volume of normal saline and kept under stirring conditions at 37°C in a Multiplate analyzer (Verum Diagnostica, Munich, Germany). Samples were then incubated with the indicated concentrations of serotonin, ketanserin, or vehicle (0.001% ascorbic acid and 1:1,000 DMSO) for 1 min. Finally, the platelet agonist was added at standardized final concentrations: 32  $\mu\text{M}$  TRAP, 0.5 mM AA, 6.5  $\mu\text{M}$  ADP, or vehicle. MEA curves from two electrode pairs were recorded for each sample and the area under the curves (AUC) was averaged. Blood samples showing a response to TRAP of  $\leq 450$  AU/min did not meet the criteria for a sufficient positive platelet aggregation control and were excluded from further analysis (4.4% of the examined samples; reasons may have been delayed sample analysis or unreported use of other antiplatelet agents). To ensure optimal comparability of the effects of serotonergic stimulation, the aggregation responses were normalized to the response to TRAP in all samples from each study participant (denoted as % of TRAP).

### Definition of low-responder status

Definition of clopidogrel low-responder status remains a matter of debate and several groups have suggested different approaches, resulting in a consensus statement that provided definitions for different platelet function tests in 2010 [12,27]. In accordance with this statement we defined clopidogrel low-responsiveness as an area under the MEA curve of  $\geq 468$  AU/min after ADP stimulation [12,27]. This corresponded to  $\geq 48\%$  of maximal

stimulation by thrombin receptor activation in all low-responders (while all responders were  $<48\%$ ). To ensure comparability, low-responsiveness in LTA was therefore also defined as maximal aggregation  $\geq 48\%$  of maximal response to thrombin receptor activation.

### Light transmission aggregometry

LTA was chosen as a gold standard for comparison with MEA findings using the same platelet agonist concentrations as described above. One third of the recruited CAD patients treated with ASA and clopidogrel ( $n = 15$ ) and all CAD patients treated with ASA only and control subjects were asked to donate an additional 30 ml of blood, which was refused by 2 CAD patients. Platelet-rich plasma (PRP) was obtained from citrated blood by centrifugation at 100 g for 10 min and adjusted to a platelet count of  $2.5 \times 10^8$ /ml with platelet-poor plasma (obtained by centrifugation at 1,000 g for 5 min). PRP was re-calcified with 1 mM  $\text{CaCl}_2$  and incubated with serotonin, ketanserin, or vehicle under stirring conditions for 1 min at  $37^\circ\text{C}$ . Platelet agonists were added as described above in MEA and LTA traces were recorded for 15 min. Maximal aggregation was defined as % light transmission compared to platelet-poor plasma.

### Measurement of serotonin release

After performing MEA, the supernatant (hirudinized whole blood devoid of platelet aggregates in case of platelet activation) was aspirated from the Multiplate cuvettes in a subset of 13 CAD patients. To avoid additional platelet activation by the following centrifugation steps, blood was incubated with 5 mM EDTA and 4  $\mu\text{g}/\text{ml}$   $\text{PgE}_1$  for 5 min. Cell-free plasma was prepared by centrifugation at 1,000 g for 5 min followed by 16,000 g for 5 min and stored at  $-80^\circ\text{C}$ . Serotonin concentration was measured with a high-sensitivity ELISA (Labor Diagnostika Nord, Hamburg, Germany).

### Statistical Analysis

Results are reported as mean and standard error of the mean. Contingency tables for clinical characteristics were analyzed with Fisher's exact test. One-way ANOVA followed by Bonferroni's multiple comparison test or unpaired t-test were used to compare quantification variables between three or two groups, respectively.

All statistical tests were two-sided and a  $P$  value of  $<0.05$  was interpreted to denote statistical significance. The statistical analysis was performed with GraphPad Prism 4.0 (GraphPad Software Inc., La Jolla, CA, USA).

## Results

### Study subjects

The 42 included CAD patients who were treated with ASA and clopidogrel showed a typical risk profile and 57% presented with acute coronary syndrome. Two thirds of these patients received at least one drug-eluting stent. There were no significant differences in the frequency of smoking, hypertension, dyslipidemia, Diabetes mellitus and ACS between clopidogrel responders and low-responders (Table 1). The group of CAD patients who were treated with ASA only was well matched with the group of CAD patients treated with ASA and clopidogrel. Control subjects were younger and healthy.

### Platelet aggregation traces

Incubation with 30  $\mu\text{M}$  TRAP (used as the reference positive control in this study) resulted in an increase in impedance in MEA (reflected by the AUC, Fig. 1A) and induced visible platelet aggregate formation under stirring conditions in LTA (increasing light transmission, Fig. 1B). The increase in light transmission after treatment with 6.5  $\mu\text{M}$  ADP was reversible, especially in clopidogrel-treated patients, as has consistently been reported before [28,29]. Serotonin at different concentrations alone induced only small increases in light transmission that were also quickly reversible (Fig. 1C), but enhanced the response to ADP in both, MEA and LTA.

### Serotonin increases residual platelet reactivity

To test whether exogenous serotonin influenced residual platelet reactivity in patients treated with ASA and clopidogrel, we measured the AUC in MEA after stimulation with the depicted agonists in all study subjects. In healthy control subjects, incubation with vehicle, serotonin (50  $\mu\text{M}$ ), AA (0.5 mM), and ADP (6.5  $\mu\text{M}$ ) induced  $17.1 \pm 1.0\%$ ,  $23.8 \pm 1.4\%$ ,  $80.8 \pm 4.2\%$ , and  $74.1 \pm 4.2\%$  of maximal (i.e. TRAP-induced) aggregation, respectively (Figure 2A). Serotonin did not further enhance AA- or ADP-induced aggregation and ketanserin did not inhibit AA-induced

**Table 1.** Baseline clinical characteristics of CAD patients treated with ASA only and CAD patients treated with ASA and clopidogrel.

| Variable/parameter        | ASA only<br>(n = 9) | Clopidogrel low-responders<br>(n = 12) | Clopidogrel responders<br>(n = 30) | <i>P</i> (ASA only vs.<br>ASA+clopidogrel) | <i>P</i> (clopidogrel low-<br>responders vs. responders) |
|---------------------------|---------------------|----------------------------------------|------------------------------------|--------------------------------------------|----------------------------------------------------------|
| Age (years) Mean $\pm$ SD | 73 $\pm$ 9          | 73 $\pm$ 14                            | 67 $\pm$ 12                        | 0.274                                      | 0.144                                                    |
| Male gender               | 7 (78)              | 9 (75)                                 | 18 (60)                            | 0.699                                      | 0.485                                                    |
| Smokers                   | 4 (44)              | 3 (25)                                 | 15 (50)                            | 1.0                                        | 0.180                                                    |
| Hypertension              | 5 (56)              | 7 (58)                                 | 23 (77)                            | 0.436                                      | 0.274                                                    |
| Dyslipidemia              | 3 (33)              | 6 (50)                                 | 16 (53)                            | 0.465                                      | 1.0                                                      |
| Diabetes mellitus         | 3 (33)              | 1 (8)                                  | 4 (13)                             | 0.137                                      | 1.0                                                      |
| Acute coronary syndrome   | 0                   | 6 (50)                                 | 18 (60)                            |                                            | 0.732                                                    |
| Drug-eluting stent        | 0                   | 9 (75)                                 | 20 (67)                            |                                            | 0.722                                                    |
| Bare-metal stent          | 0                   | 4 (33)                                 | 10 (33)                            |                                            | 1.0                                                      |

Healthy control subjects ( $n = 10$ ) were  $34 \pm 4$  years old, 5 were male, 1 smoked and none suffered from the mentioned diseases.  $P$  values for the comparison of CAD patients with ASA only vs. all CAD patients with ASA+clopidogrel and for the comparison of clopidogrel low-responders vs. responders. Number of patients (%), unless otherwise indicated.

doi:10.1371/journal.pone.0032656.t001

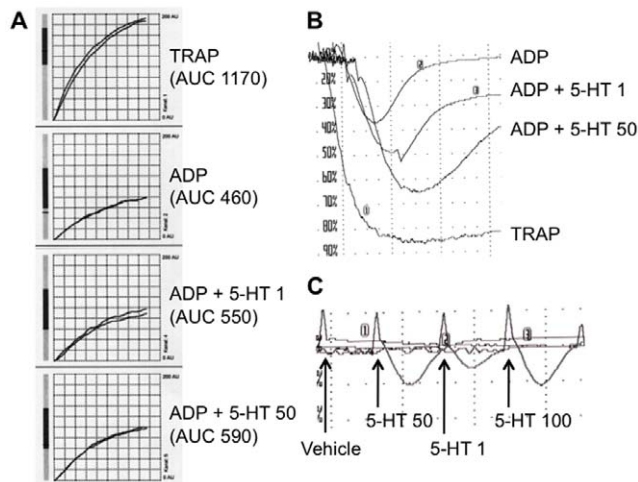

**Figure 1. Representative aggregation traces.** (A) Exemplary multiple electrode aggregometry traces in whole blood from a clopidogrel responder after adding the depicted agonists (AUC denotes area under the curve). (B) Light transmission aggregometry (LTA) with platelet-rich plasma and the depicted agonists. (C) LTA with vehicle or serotonin only. The following agonist concentrations were used: 32  $\mu$ M TRAP, 6.5  $\mu$ M ADP, 1, 50, or 100  $\mu$ M serotonin. doi:10.1371/journal.pone.0032656.g001

aggregation. On the contrary, ketanserin significantly decreased ADP-induced aggregation by 24.8% in this group. Similar results were seen in CAD patients who were treated with ASA only (Fig. 2B), except for the well-inhibited response to AA. Ketanserin decreased ADP-induced aggregation by 16.4% (not significant).

In the entire cohort of ASA- and clopidogrel-treated CAD patients, vehicle-, serotonin-, AA-, and ADP-induced aggregation was  $13.6 \pm 2.2\%$ ,  $22.2 \pm 1.6\%$ ,  $23.5 \pm 2.1\%$ , and  $40.6 \pm 1.9\%$ , respectively (Figure 2C). Addition of 50  $\mu$ M serotonin resulted in a non-significant increase in AA-induced aggregation to  $32.2 \pm 2.9\%$ . ADP-induced aggregation increased dose-dependently after addition of serotonin (up to  $51.6 \pm 2.7\%$  with 100  $\mu$ M serotonin,  $p < 0.05$ ), while ketanserin did not induce significant changes. Adding ketanserin to serotonin-treated samples abolished the enhancement of ADP-induced aggregation by serotonin entirely (not shown). These findings indicate that serotonin enhances residual platelet reactivity in ASA- and clopidogrel-treated patients and that serotonin antagonism decreases ADP-induced aggregation in control subjects.

### Serotonin increases ADP-induced platelet aggregation in clopidogrel responders

We next asked whether clopidogrel responder status influenced these effects. Serotonin dose-dependently increased ADP-induced platelet aggregation in clopidogrel responders (Figure 3A): Mean ADP-induced aggregation was  $33.7 \pm 1.3\%$  and  $60.0 \pm 3.1\%$  in clopidogrel responders ( $n = 30$ ) and clopidogrel low-responders ( $n = 12$ ), respectively, and adding 50  $\mu$ M serotonin increased ADP-induced aggregation to  $40.9 \pm 2.0\%$  (corresponding to an increase by 21%,  $p < 0.01$ ) and  $62.6 \pm 5.2\%$  (4% increase, not significant) in these groups. Higher serotonin concentrations (100  $\mu$ M) further increased aggregation (to  $48.2 \pm 2.0\%$  in clopidogrel responders, 43% increase,  $p < 0.001$ , and to  $72.5 \pm 3.5\%$  in clopidogrel low-responders, 21% increase, not significant). Therefore, serotonin enhanced platelet reactivity, especially in clopidogrel responders.

### Ketanserin improves platelet inhibition in clopidogrel low-responders

To examine whether anti-serotonergic treatment could reduce enhanced on-treatment platelet reactivity in clopidogrel low-responders, we blocked the main platelet serotonin receptor 5-HT<sub>2A</sub> with the standard antagonist ketanserin. Ketanserin reduced ADP-induced aggregation in clopidogrel low-responders only (from  $60.0 \pm 3.1\%$  to  $37.4 \pm 3.5\%$ , corresponding to a decrease by 37%,  $p < 0.01$ , Figure 3B) and did not change ADP-induced aggregation in clopidogrel responders (Fig. 3A). In a subset of 13 CAD patients treated with ASA and clopidogrel (9 clopidogrel responders, 4 low-responders), sarpogrelate, a more selective 5-HT<sub>2A</sub> receptor antagonist, had a similar effect as ketanserin (not shown). These results indicate that residual platelet reactivity could be reduced in clopidogrel low-responders by inhibiting the 5-HT<sub>2A</sub> receptor.

### LTA reproduces the MEA results

LTA (with PRP) was performed as a gold standard to verify the MEA findings (whole blood) because to date, not all scientific groups have accepted whole blood impedance aggregometry as a standard platelet function test. In healthy control subjects TRAP treatment resulted in  $81.9 \pm 2.5\%$  light transmission, i.e. aggregation (Fig. 4A), compared to  $5.8 \pm 0.8\%$  with vehicle (not shown). In all CAD patients maximal aggregation was  $72.1 \pm 2.1\%$  after incubation with TRAP (Fig. 4B–D) and  $9.6 \pm 1.9\%$  with vehicle (not shown). Serotonin or ketanserin did not significantly change ADP-induced aggregation in healthy control subjects (Fig. 4A) or CAD patients treated with ASA alone (Fig. 4B). On the contrary, serotonin significantly increased ADP-induced platelet aggregation in PRP from clopidogrel responders from  $35.5 \pm 3.2\%$  to  $58.8 \pm 5.1\%$  with 50  $\mu$ M serotonin ( $p < 0.05$ ) and to  $64.8 \pm 7.7\%$  with 100  $\mu$ M serotonin ( $p < 0.01$ , Fig. 4C). Clopidogrel low-responders showed a non-significant increase in ADP-induced aggregation with serotonin (Fig. 4D). Ketanserin did not significantly change ADP-induced aggregation in clopidogrel responders but induced a non-significant decrease by 46% in the 3 clopidogrel low-responders examined with LTA. In summary, LTA confirmed the MEA results (with a non-significant trend in the group with 3 clopidogrel low-responders).

### ADP-induced serotonin release is higher in clopidogrel low-responders

In a subset of 13 CAD patients randomly chosen for measuring serotonin release, 4 were identified as clopidogrel low-responders. TRAP induced a significant serotonin release in both, responders and low-responders (Fig. 5). The TRAP-induced serotonin release was 12% higher in clopidogrel low-responders as compared to responders (not significant). ADP induced a 38% higher serotonin release in low-responders as compared to responders (not significant). A power calculation estimated a required sample size of 43 clopidogrel responders and 15 low-responders to reveal whether this difference is statistically significant.

### Discussion

This *in vitro* study with blood from 42 CAD patients treated with ASA and clopidogrel, 9 CAD patients treated with ASA only, and 10 healthy control subjects aimed at elucidating the effects of serotonergic and anti-serotonergic manipulation on platelet reactivity on top of standard treatment. While the standard of care treatment after coronary stent implantation includes dual antiplatelet therapy with ASA and a P2Y<sub>12</sub> blocker, anti-serotonergic agents, namely 5-HT<sub>2A</sub> receptor blockers, were

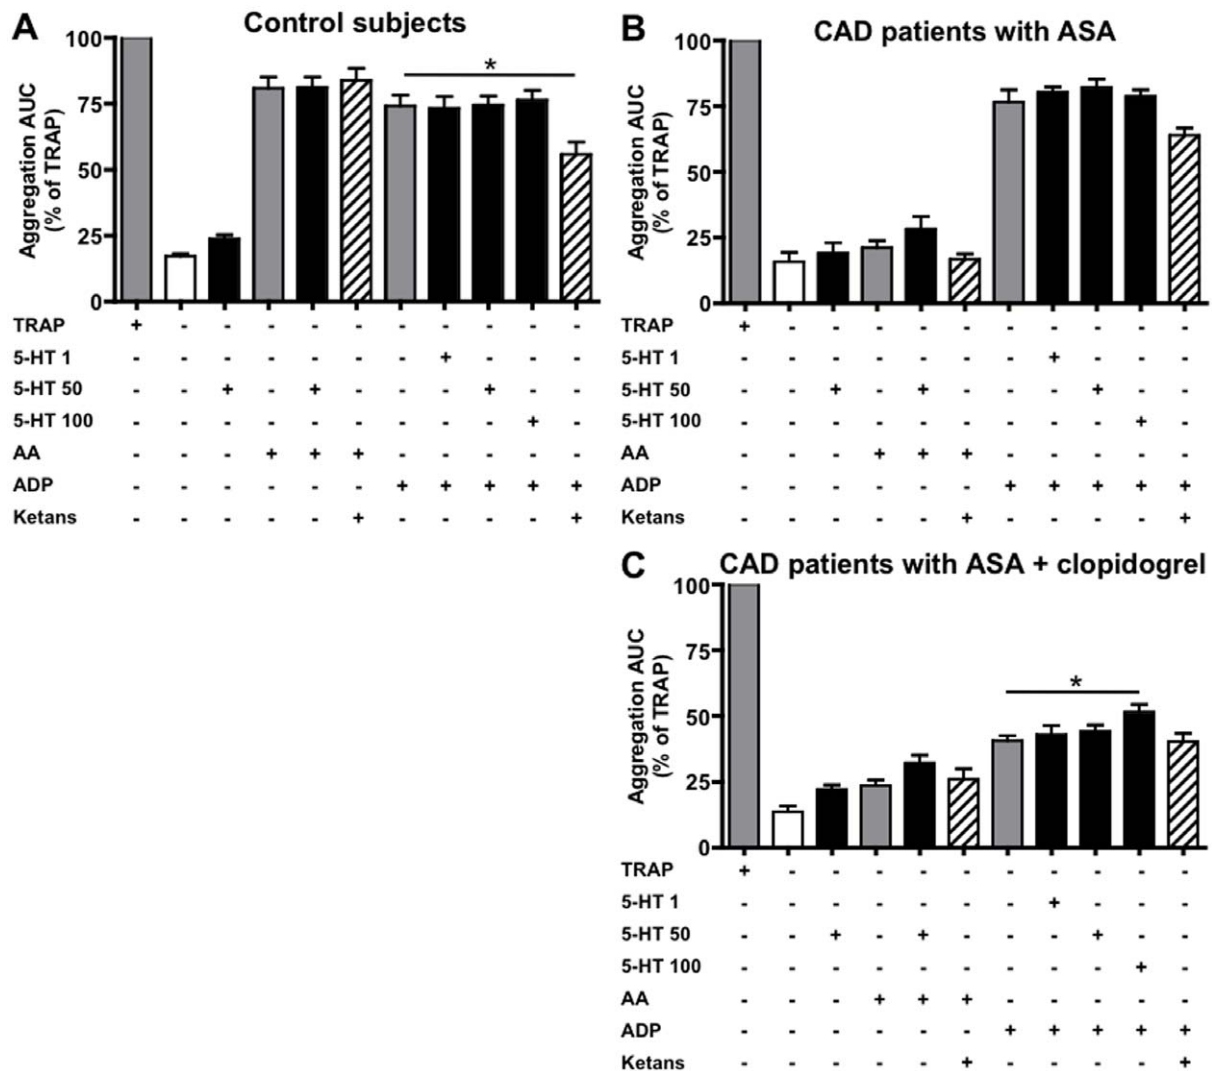

**Figure 2. Serotonin increases platelet reactivity in whole blood impedance aggregometry.** Whole blood from healthy control subjects (A,  $n=10$ ), coronary artery disease (CAD) patients treated with ASA alone (B,  $n=9$ ), and the total study cohort of CAD patients treated with ASA and clopidogrel (C,  $n=42$ ) after incubation with the depicted substances. The following agonist/antagonist concentrations were used: 32  $\mu$ M TRAP, 0.5 mM AA, 50  $\mu$ M serotonin, 10  $\mu$ M ketanserin. \*  $p<0.05$  in ANOVA followed by Bonferroni's multiple comparison test. doi:10.1371/journal.pone.0032656.g002

proposed as an adjunct in the newer concept of triple antiplatelet therapy.

Inhibition of the 5-HT<sub>2A</sub> receptor, which is the main serotonin receptor on platelets and arterial smooth muscle cells, with ketanserin or the newer, more selective agents sarpgrelate and APD791 prevented occlusive arterial thrombus formation in several studies [30,31,32,33]. The group around Willerson established that ketanserin inhibits serotonin-induced cyclic flow variations caused by platelet aggregation and vasoconstriction in a canine model of coronary artery stenosis and injury [34,35,36,37,38,39]. The same group also showed that high levels of serotonin are released locally during percutaneous coronary intervention and that serotonin antagonism can enhance coronary blood flow in patients with CAD [24,40]. Sarpgrelate reduced restenosis after coronary stenting in a Japanese study of 79 patients with stable angina [41]. A phase III randomized trial with 1,510 patients showed non-inferiority of sarpgrelate to ASA in secondary prevention after stroke [42]. In Japan, sarpgrelate was approved for the treatment of peripheral arterial disease in

1993. We found recently that stimulation of 5-HT<sub>2A</sub> receptor induced shedding of the adhesion receptor GPIIb/IIIa from the platelet surface [43]. In the light of clopidogrel hypo-responsiveness and the quest for optimal treatment of CAD patients, the effects of serotonergic intervention in CAD patients treated with ASA and clopidogrel are a topic of clinical relevance. Currently, no clinical trials investigating serotonin antagonism on top of dual antiplatelet therapy after percutaneous coronary intervention are registered at clinicaltrials.gov.

We examined whole blood from CAD patients taking ASA and clopidogrel after coronary stent placement with MEA and found that 28.5% did not respond adequately to clopidogrel. This is in accordance with previously published studies applying similar platelet function testing [12,44]. We found that in clopidogrel responders, additional serotonin dose-dependently increased ADP-induced aggregation, i.e. on-treatment platelet reactivity to ADP. This suggests, that the platelet helper-agonist status of serotonin can also be extended to CAD patients with dual antiplatelet therapy [18,22].



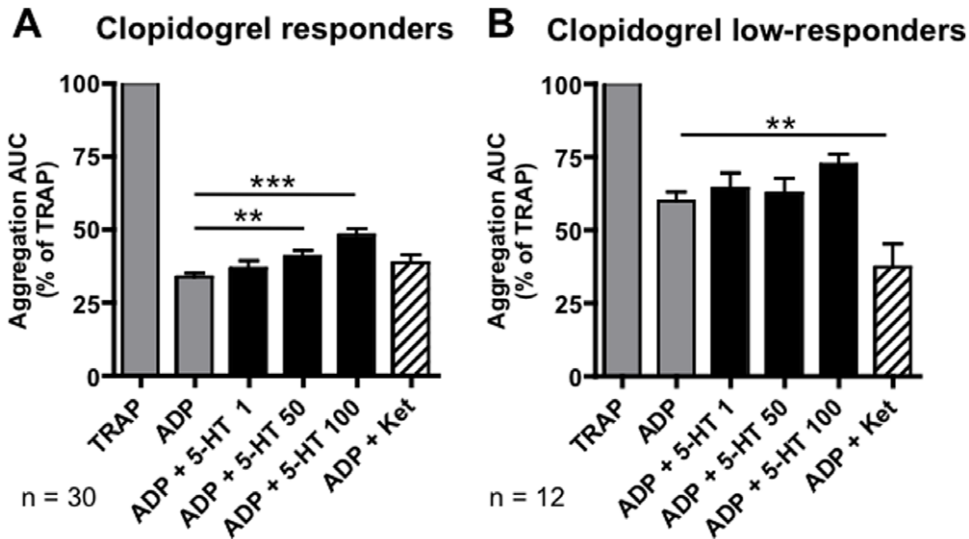

**Figure 3. Serotonin enhances ADP-induced aggregation in clopidogrel responders and ketanserin reverts high on-treatment reactivity in clopidogrel low-responders.** Multiple electrode aggregometry of whole blood from clopidogrel responders (A, mean AUC  $\pm$  standard deviation after incubation with ADP:  $280 \pm 86$  AU/min) and low-responders (B, AUC with ADP  $512 \pm 127$  AU/min) normalized to the response induced by TRAP. The following agonist/antagonist concentrations were used: 32  $\mu$ M TRAP, 6.5  $\mu$ M ADP, 1, 50, or 100  $\mu$ M serotonin, 10  $\mu$ M ketanserin. \*\*  $p < 0.01$  and \*\*\*  $p < 0.001$  in ANOVA followed by Bonferroni's multiple comparison test. doi:10.1371/journal.pone.0032656.g003

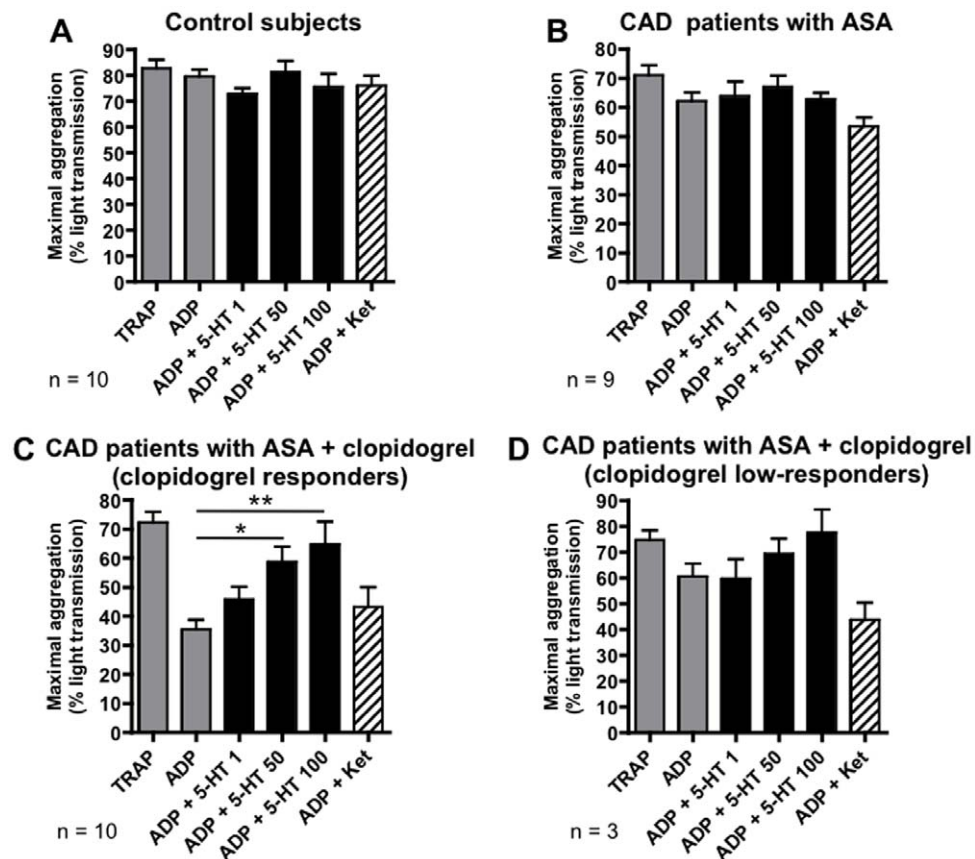

**Figure 4. Confirmation with light transmission aggregometry.** Maximal light transmission, i.e. platelet aggregation in platelet-rich plasma from healthy control subjects (A), CAD patients treated with ASA alone (B), and clopidogrel responders (C) and low-responders (D) among CAD patients treated with ASA and clopidogrel. The following agonist/antagonist concentrations were used: 32  $\mu$ M TRAP, 6.5  $\mu$ M ADP, 50  $\mu$ M serotonin, 10  $\mu$ M ketanserin. \*  $p < 0.05$  and \*\*  $p < 0.01$  in ANOVA followed by Bonferroni's multiple comparison test. doi:10.1371/journal.pone.0032656.g004

**A Clopidogrel responders    B Clopidogrel low-responders**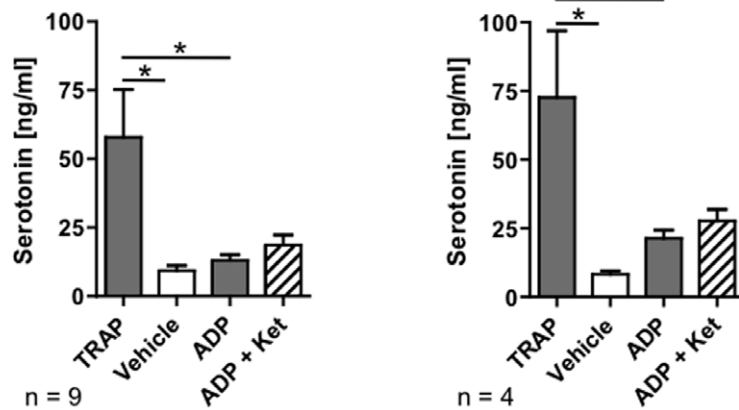

**Figure 5. Serotonin release.** Agonist-induced serotonin release was measured by high-sensitivity ELISA in a subset of 13 CAD patients treated with ASA and clopidogrel, among whom 9 were identified as clopidogrel responders (A) and 4 as low-responders (B). The following agonist/antagonist concentrations were used: 32  $\mu$ M TRAP, 6.5  $\mu$ M ADP, 10  $\mu$ M ketanserin. \*  $p < 0.05$  in ANOVA followed by Bonferroni's multiple comparison test. doi:10.1371/journal.pone.0032656.g005

Most interestingly, antagonizing the platelet serotonin receptor with the standard 5-HT<sub>2A</sub> receptor blocker ketanserin highly significantly improved platelet inhibition in clopidogrel low-responders. Ketanserin reduced ADP-induced aggregation in these patients approximately reaching the levels of clopidogrel responders. These results allow the hypothesis that clopidogrel hypo-responsiveness could be overcome with a serotonin receptor blocker. A possible explanation for ketanserin being effective in clopidogrel low-responders but not responders, is that ADP may induce relevant serotonin release in clopidogrel low-responders only, because P<sub>2Y</sub><sub>12</sub> is not sufficiently inhibited in these patients. Indeed, we saw an increase in serotonin release after incubation with ADP in clopidogrel low-responders that appeared higher than in responders. Evaluating whether this increase is statistically significant will require a larger sample size as the one chosen for this pilot study.

The fact that ketanserin did not reduce platelet aggregation beyond clopidogrel responder levels is suggestive for a favorable risk profile of triple antiplatelet therapy with anti-serotonergic agents: the risk for bleeding may not increase. More studies, especially investigating *in vivo* administration of serotonin blockers in addition to standard treatment, are needed to confirm these results. Several clinical trials have demonstrated that clopidogrel low-responder status is associated with an unfavorable clinical outcome (reviewed in [11,44]). Future trials evaluating triple antiplatelet therapy with anti-serotonergic agents, such as sarpogrelate or APD791, should particularly address the question whether morbidity and mortality can be reduced with serotonin blockers. In addition to suggested beneficial effects on vascular tone, ischemic tolerance, prevention of coronary restenosis, and insulin resistance, based on our findings, we hypothesize that this strategy may particularly improve platelet inhibition without further increasing bleeding complications [45,46,47].

### Limitations

As a single-center study with pilot character, this investigation included only 42 CAD patients, 12 of whom were clopidogrel low-responders. Such a small sample size limits the generalization of

our conclusions. Larger studies are warranted to confirm the findings. We used ketanserin to antagonize the 5-HT<sub>2A</sub> receptor *in vitro*, because it is considered a long-established standard substance. Clinical use of ketanserin in CAD was promising at first, but has been discontinued because of an unfavorable risk profile, including a possible association with the development of diabetes [30,48]. Future trials should therefore focus on the aforementioned newer, more selective agents, one of which (sarpogrelate) showed similar results in a subset of samples in our study. While the MEA findings were largely reproduced with LTA, the improvement of platelet inhibition in clopidogrel low-responders with ketanserin did not reach statistical significance with LTA. Only 3 out of the 13 CAD patients who donated additional blood for LTA measurements showed clopidogrel hypo-responsiveness and we believe that the non-significance of this result was mainly due to the particularly small sample size in this group.

### Conclusions

This *in vitro* study demonstrates that serotonin increases residual platelet reactivity in patients who respond to ASA and clopidogrel after coronary stent placement. In clopidogrel low-responders, serotonin receptor antagonism improves platelet inhibition, almost reaching responder levels. Further investigation of triple antiplatelet therapy with anti-serotonergic agents to decrease elevated on-treatment platelet reactivity therefore appears promising.

### Acknowledgments

The authors thank Bianca Engert and Freya Roming for their valuable support.

### Author Contributions

Conceived and designed the experiments: DD IA C. Bode M. Moser. Performed the experiments: DD SW M. Mauler C. Brandt. Analyzed the data: DD M. Mauler M. Moser. Contributed reagents/materials/analysis tools: DD IA M. Mauler C. Brandt SW M. Moser. Wrote the paper: DD IA M. Moser.

### References

1. Davi G, Patrono C (2007) Platelet activation and atherothrombosis. *N Engl J Med* 357: 2482–2494.
2. Hamm CW, Bassand JP, Agewall S, Bax J, Boersma E, et al. (2011) ESC Guidelines for the management of acute coronary syndromes in patients

- presenting without persistent ST-segment elevation: The Task Force for the management of acute coronary syndromes (ACS) in patients presenting without persistent ST-segment elevation of the European Society of Cardiology (ESC). *Eur Heart J*.
3. Levine GN, Bates ER, Blankenship JC, Bailey SR, Bittl JA, et al. (2011) 2011 ACCF/AHA/SCAI Guideline for Percutaneous Coronary Intervention: A Report of the American College of Cardiology Foundation/American Heart Association Task Force on Practice Guidelines and the Society for Cardiovascular Angiography and Interventions. *Circulation*.
  4. Ahrens I, Bode C (2009) Novel antiplatelet therapies following percutaneous coronary interventions. *Curr Opin Investig Drugs* 10: 902–911.
  5. Kulickowski W, Witkowski A, Polonski L, Watala C, Filipiak K, et al. (2009) Interindividual variability in the response to oral antiplatelet drugs: a position paper of the Working Group on antiplatelet drugs resistance appointed by the Section of Cardiovascular Interventions of the Polish Cardiac Society, endorsed by the Working Group on Thrombosis of the European Society of Cardiology. *Eur Heart J* 30: 426–435.
  6. Gurbel PA, Bliden KP, Hiatt BL, O'Connor CM (2003) Clopidogrel for coronary stenting: response variability, drug resistance, and the effect of pretreatment platelet reactivity. *Circulation* 107: 2908–2913.
  7. Leon C, Hechler B, Freund M, Eckly A, Vial C, et al. (1999) Defective platelet aggregation and increased resistance to thrombosis in purinergic P2Y<sub>1</sub> receptor-null mice. *J Clin Invest* 104: 1731–1737.
  8. Wiviott SD, Trenk D, Frelinger AL, O'Donoghue M, Neumann FJ, et al. (2007) Prasugrel compared with high loading- and maintenance-dose clopidogrel in patients with planned percutaneous coronary intervention: the Prasugrel in Comparison to Clopidogrel for Inhibition of Platelet Activation and Aggregation-Thrombolysis in Myocardial Infarction 44 trial. *Circulation* 116: 2923–2932.
  9. Wallentin L, Varenhorst C, James S, Erlinge D, Braun OO, et al. (2008) Prasugrel achieves greater and faster P2Y<sub>12</sub> receptor-mediated platelet inhibition than clopidogrel due to more efficient generation of its active metabolite in aspirin-treated patients with coronary artery disease. *Eur Heart J* 29: 21–30.
  10. Storey RF, Husted S, Harrington RA, Heptinstall S, Wilcox RG, et al. (2007) Inhibition of platelet aggregation by AZD6140, a reversible oral P2Y<sub>12</sub> receptor antagonist, compared with clopidogrel in patients with acute coronary syndromes. *J Am Coll Cardiol* 50: 1852–1856.
  11. Dierschmied D, Bode C, Moser M (2010) Clopidogrel in acute coronary syndrome: implications of recent study findings. *Expert Rev Cardiovasc Ther* 8: 1215–1229.
  12. Bonello L, Tantry US, Marcucci R, Blindt R, Angiolillo DJ, et al. (2010) Consensus and future directions on the definition of high on-treatment platelet reactivity to adenosine diphosphate. *J Am Coll Cardiol* 56: 919–933.
  13. Cattaneo M (2009) Light transmission aggregometry and ATP release for the diagnostic assessment of platelet function. *Semin Thromb Hemost* 35: 158–167.
  14. Hochholzer W, Trenk D, Bestehorn HP, Fischer B, Valina CM, et al. (2006) Impact of the degree of peri-interventional platelet inhibition after loading with clopidogrel on early clinical outcome of elective coronary stent placement. *J Am Coll Cardiol* 48: 1742–1750.
  15. Sibbing D, Braun S, Jawansky S, Vogt W, Mehilli J, et al. (2008) Assessment of ADP-induced platelet aggregation with light transmission aggregometry and multiple electrode platelet aggregometry before and after clopidogrel treatment. *Thromb Haemost* 99: 121–126.
  16. Siller-Matula JM, Christ G, Lang IM, Delle-Karth G, Huber K, et al. (2010) Multiple electrode aggregometry predicts stent thrombosis better than the vasodilator-stimulated phosphoprotein phosphorylation assay. *J Thromb Haemost* 8: 351–359.
  17. Galan AM, Lopez-Vilchez I, Diaz-Ricart M, Navalon F, Gomez E, et al. (2009) Serotonergic mechanisms enhance platelet-mediated thrombogenicity. *Thromb Haemost* 102: 511–519.
  18. Walther DJ, Peter JU, Winter S, Holtje M, Paulmann N, et al. (2003) Serotonylation of small GTPases is a signal transduction pathway that triggers platelet alpha-granule release. *Cell* 115: 851–862.
  19. Lopez-Vilchez I, Diaz-Ricart M, White JG, Escobar G, Galan AM (2009) Serotonin enhances platelet procoagulant properties and their activation induced during platelet tissue factor uptake. *Cardiovasc Res* 84: 309–316.
  20. Dale GL, Friese P, Batar P, Hamilton SF, Reed GL, et al. (2002) Stimulated platelets use serotonin to enhance their retention of procoagulant proteins on the cell surface. *Nature* 415: 175–179.
  21. Benedict CR, Mathew B, Rex KA, Cartwright J, Jr., Sordahl LA (1986) Correlation of plasma serotonin changes with platelet aggregation in an in vivo dog model of spontaneous occlusive coronary thrombus formation. *Circ Res* 58: 58–67.
  22. Dierschmied D, Bode C (2009) [The role of serotonin in haemostasis]. *Hamostaseologie* 29: 356–359.
  23. McNicol A, Israels SJ (1999) Platelet dense granules: structure, function and implications for haemostasis. *Thromb Res* 95: 1–18.
  24. Golino P, Piscione F, Willerson JT, Cappelli-Bigazzi M, Focaccio A, et al. (1991) Divergent effects of serotonin on coronary-artery dimensions and blood flow in patients with coronary atherosclerosis and control patients. *N Engl J Med* 324: 641–648.
  25. Andrade C, Sandarsh S, Chethan KB, Nagesh KS (2010) Serotonin reuptake inhibitor antidepressants and abnormal bleeding: a review for clinicians and a reconsideration of mechanisms. *J Clin Psychiatry* 71: 1565–1575.
  26. Tseng YL, Chiang ML, Huang TF, Su KP, Lane HY, et al. (2010) A selective serotonin reuptake inhibitor, citalopram, inhibits collagen-induced platelet aggregation and activation. *Thromb Res* 126: 517–523.
  27. Sibbing D, Braun S, Morath T, Mehilli J, Vogt W, et al. (2009) Platelet reactivity after clopidogrel treatment assessed with point-of-care analysis and early drug-eluting stent thrombosis. *J Am Coll Cardiol* 53: 849–856.
  28. Holdrinet A, Ewals M, Reichert WJ, Haanen C (1969) Mathematical correlation between ADP-induced platelet aggregation and subsequent disaggregation. A parameter for the velocity of disaggregation. *Scand J Haematol* 6: 354–364.
  29. Francischetti IM, Ribeiro JM, Champagne D, Andersen J (2000) Purification, cloning, expression, and mechanism of action of a novel platelet aggregation inhibitor from the salivary gland of the blood-sucking bug, *Rhodnius prolixus*. *J Biol Chem* 275: 12639–12650.
  30. Prevention of Atherosclerotic Complications with Ketanserin Trial Group (1989) Prevention of atherosclerotic complications: controlled trial of ketanserin. *BMJ* 298: 424–430.
  31. Adams JW, Ramirez J, Shi Y, Thomsen W, Frazer J, et al. (2009) APD791, 3-methoxy-N-(3-(1-methyl-1H-pyrazol-5-yl)-4-(2-morpholinoethoxy)phenyl)benzamide, a novel 5-hydroxytryptamine 2A receptor antagonist: pharmacological profile, pharmacokinetics, platelet activity and vascular biology. *J Pharmacol Exp Ther* 331: 96–103.
  32. Przyklenk K, Frelinger AL, 3rd, Linden MD, Whittaker P, Li Y, et al. (2010) Targeted inhibition of the serotonin 5HT<sub>2A</sub> receptor improves coronary patency in an in vivo model of recurrent thrombosis. *J Thromb Haemost* 8: 331–340.
  33. Nishihira K, Yamashita A, Tanaka N, Kawamoto R, Imamura T, et al. (2006) Inhibition of 5-hydroxytryptamine receptor prevents occlusive thrombus formation on neointima of the rabbit femoral artery. *J Thromb Haemost* 4: 247–255.
  34. Golino P, Ashton JH, Glas-Greenwalt P, McNatt J, Buja LM, et al. (1988) Mediation of reocclusion by thromboxane A<sub>2</sub> and serotonin after thrombolysis with tissue-type plasminogen activator in a canine preparation of coronary thrombosis. *Circulation* 77: 678–684.
  35. Bush LR, Campbell WB, Kern K, Tilton GD, Apprill P, et al. (1984) The effects of alpha 2-adrenergic and serotonergic receptor antagonists on cyclic blood flow alterations in stenosed canine coronary arteries. *Circ Res* 55: 642–652.
  36. Ashton JH, Benedict CR, Fitzgerald C, Raheja S, Taylor A, et al. (1986) Serotonin as a mediator of cyclic flow variations in stenosed canine coronary arteries. *Circulation* 73: 572–578.
  37. Ashton JH, Ogletree ML, Michel IM, Golino P, McNatt JM, et al. (1987) Cooperative mediation by serotonin S<sub>2</sub> and thromboxane A<sub>2</sub>/prostaglandin H<sub>2</sub> receptor activation of cyclic flow variations in dogs with severe coronary artery stenoses. *Circulation* 76: 952–959.
  38. Golino P, Ashton JH, Buja LM, Rosolowsky M, Taylor AL, et al. (1989) Local platelet activation causes vasoconstriction of large epicardial canine coronary arteries in vivo. Thromboxane A<sub>2</sub> and serotonin are possible mediators. *Circulation* 79: 154–166.
  39. Ashton JH, Golino P, McNatt JM, Buja LM, Willerson JT (1989) Serotonin S<sub>2</sub> and thromboxane A<sub>2</sub>-prostaglandin H<sub>2</sub> receptor blockade provide protection against epinephrine-induced cyclic flow variations in severely narrowed canine coronary arteries. *J Am Coll Cardiol* 13: 755–763.
  40. Golino P, Piscione F, Benedict CR, Anderson HV, Cappelli-Bigazzi M, et al. (1994) Local effect of serotonin released during coronary angioplasty. *N Engl J Med* 330: 523–528.
  41. Fujita M, Mizuno K, Ho M, Tsukahara R, Miyamoto A, et al. (2003) Sarpogrelate treatment reduces restenosis after coronary stenting. *Am Heart J* 145: E16.
  42. Shinohara Y, Nishimaru K, Sawada T, Terashi A, Handa S, et al. (2008) Sarpogrelate-Aspirin Comparative Clinical Study for Efficacy and Safety in Secondary Prevention of Cerebral Infarction (S-ACCESS): A randomized, double-blind, aspirin-controlled trial. *Stroke* 39: 1827–1833.
  43. Dierschmied D, Canault M, Lievens D, Brill A, Cifuni SM, et al. (2009) Serotonin stimulates platelet receptor shedding by tumor necrosis factor-alpha-converting enzyme (ADAM17). *J Thromb Haemost* 7: 1163–1171.
  44. Wallentin L (2009) P2Y<sub>12</sub> inhibitors: differences in properties and mechanisms of action and potential consequences for clinical use. *Eur Heart J* 30: 1964–1977.
  45. Kokubu N, Tsuchihashi K, Yuda S, Hase M, Eguchi M, et al. (2006) Persistent insulin-sensitizing effects of sarpogrelate hydrochloride, a serotonin 2A receptor antagonist, in patients with peripheral arterial disease. *Circ J* 70: 1451–1456.
  46. Shimizu Y, Minatoguchi S, Hashimoto K, Uno Y, Arai M, et al. (2002) The role of serotonin in ischemic cellular damage and the infarct size-reducing effect of sarpogrelate, a 5-hydroxytryptamine-2 receptor blocker, in rabbit hearts. *J Am Coll Cardiol* 40: 1347–1355.
  47. Horibe E, Nishigaki K, Minatoguchi S, Fujiwara H (2004) Sarpogrelate, a 5-HT<sub>2</sub> receptor blocker, may have a preconditioning-like effect in patients with coronary artery disease. *Circ J* 68: 68–72.
  48. Gilles M, Wilke A, Kopf D, Nonell A, Lehnert H, et al. (2005) Antagonism of the serotonin (5-HT)<sub>2</sub> receptor and insulin sensitivity: implications for atypical antipsychotics. *Psychosom Med* 67: 748–751.
